# Supplementary material for: Fast and real-time acetone gas sensor using hybrid ZnFe2O4/ZnO hollow spheres
Source: Royal Society of Chemistry journal article supplement (doi:10.1039/c6ra12201a), 2016-01-01
Supplement: c6ra12201a1.pdf [file c6ra12201a1.pdf]

***Electronic Supplementary Information (ESI)***

***For***

**Fast and real-time acetone gas sensor using hybrid ZnFe<sub>2</sub>O<sub>4</sub>/ZnO hollow  
spheres**

Rui Zhang,<sup>a</sup> Tong Zhang,<sup>a,c</sup> Tingting Zhou,<sup>a</sup> Zheng Lou,<sup>b</sup> Jianan Deng,<sup>a</sup> Lili Wang<sup>a\*</sup>

<sup>a</sup>. State Key Laboratory on Integrated Optoelectronics, College of Electronic Science and Engineering, Jilin University, Changchun 130012, PR China

<sup>b</sup>. State Key Laboratory for Superlattices and Microstructures, Institute of Semiconductors, Chinese Academy of Sciences, Beijing 100083, China.

<sup>c</sup>. State Key Laboratory of Transducer Technology, Chinese Academy of Sciences, Beijing 100083, China.

Email: lili\_wang@jlu.edu.cn

## Experiment Section

**Fabrication of gas sensor.** The typical fabrication of side-heated gas sensor was described as follows: the sample was put into an agate mortar and ground with a pestle for 30 min at least. Then, some deionized water was dropped in it and another 30 min for grinding were necessary. Then the mixed paste was dipped and pasted onto an alumina tube with 4 mm long, which was attached with four Pt wires and two Au electrodes. Then a small Ni-Cr alloy coil was inserted into the tube as a heater. The testable gas sensor was obtained after connecting the as-fabricated device with outside electronics by welding.

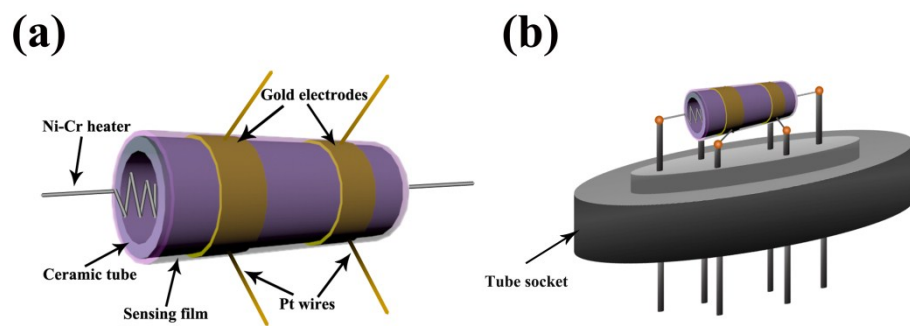

**Figure S1.** (a) Typical image of the ceramic tube and (b) the structure schematic image of the sensor based on hybrid  $\text{ZnFe}_2\text{O}_4/\text{ZnO}$  hollow sphere.

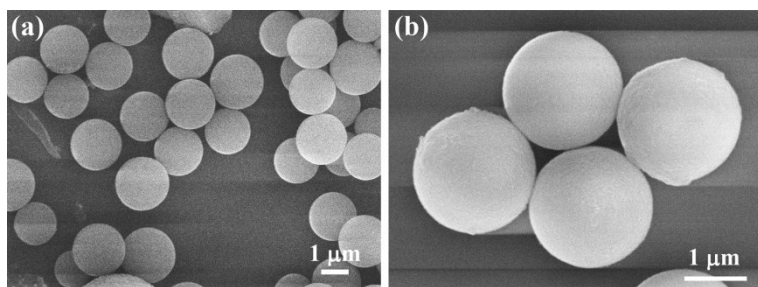

**Figure S2.** SEM (a) and enlarged SEM (b) images of carbon spheres synthesized through hydrothermal.

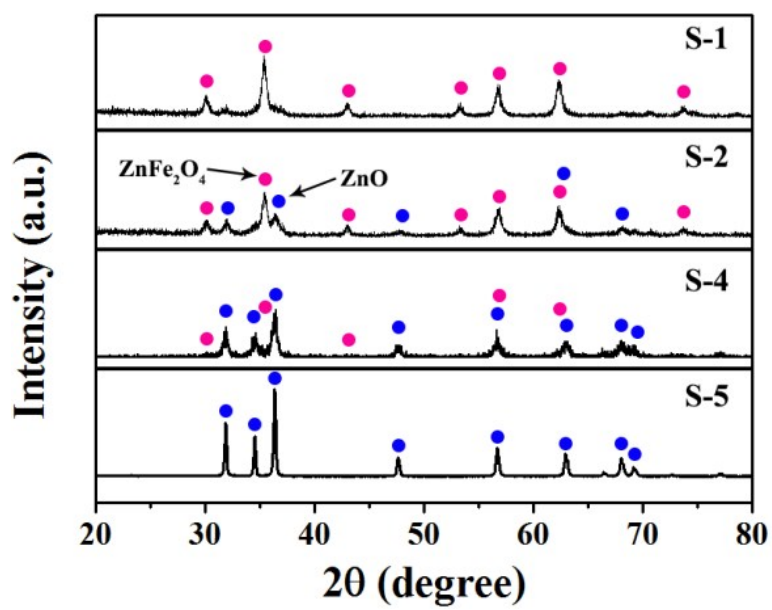

**Figure S3.** X-ray diffraction patterns of ZnFe<sub>2</sub>O<sub>4</sub>- or ZnO-based hollow spheres with different ratios.

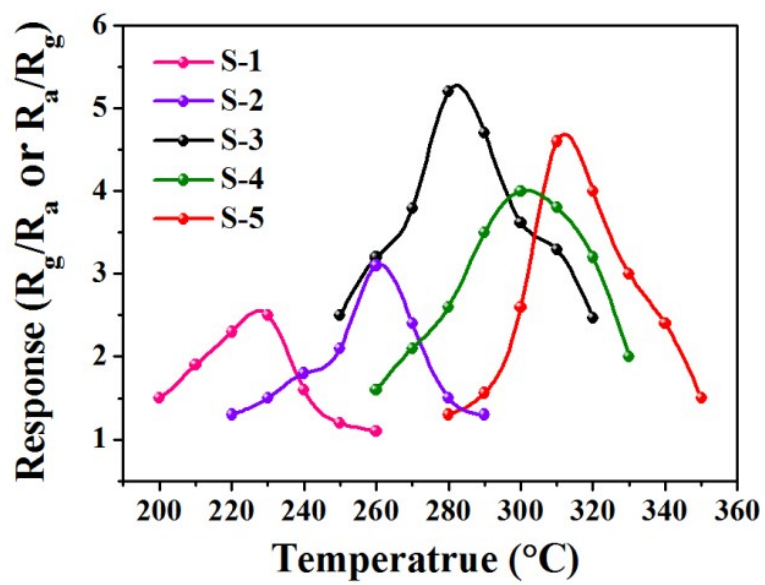

**Figure S4.** Responses of five  $\text{ZnFe}_2\text{O}_4$ - or  $\text{ZnO}$ -based sensors with different molar ratios, pure  $\text{ZnFe}_2\text{O}_4$  and  $\text{ZnO}$  at different operating temperatures towards 50 ppm of acetone, respectively.

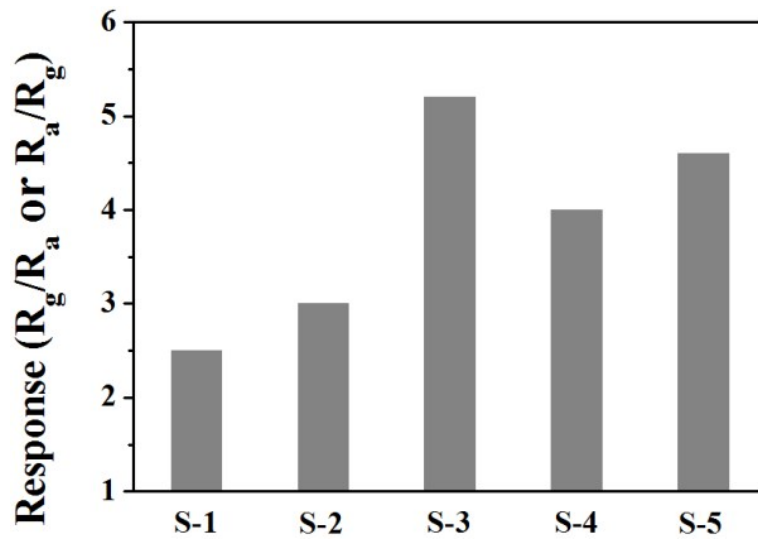

**Figure S5.** Response of hybrid ZnFe<sub>2</sub>O<sub>4</sub>/ZnO-based sensors with different ratios towards 50 ppm acetone at the optimum temperature.

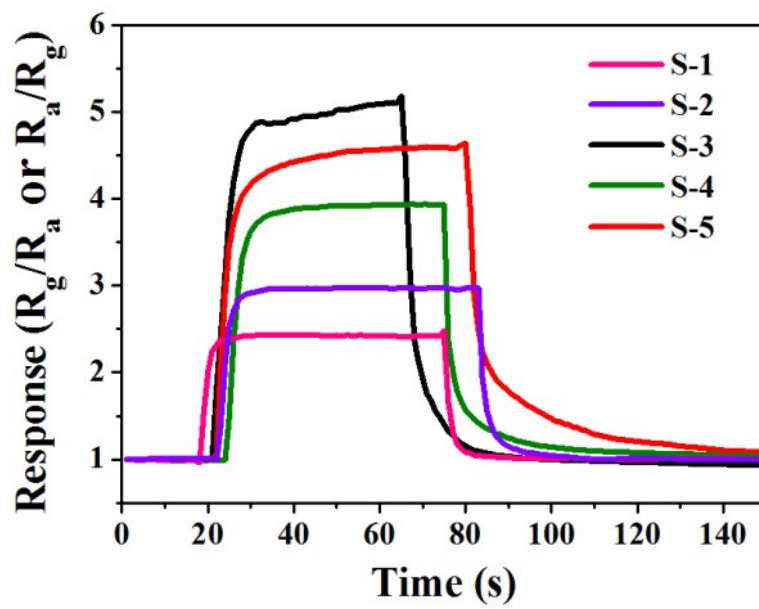

**Figure S6.** One cycle of response transient of the  $\text{ZnFe}_2\text{O}_4/\text{ZnO}$ -based sensor with different ratios to 50 ppm acetone at the optimum temperature.



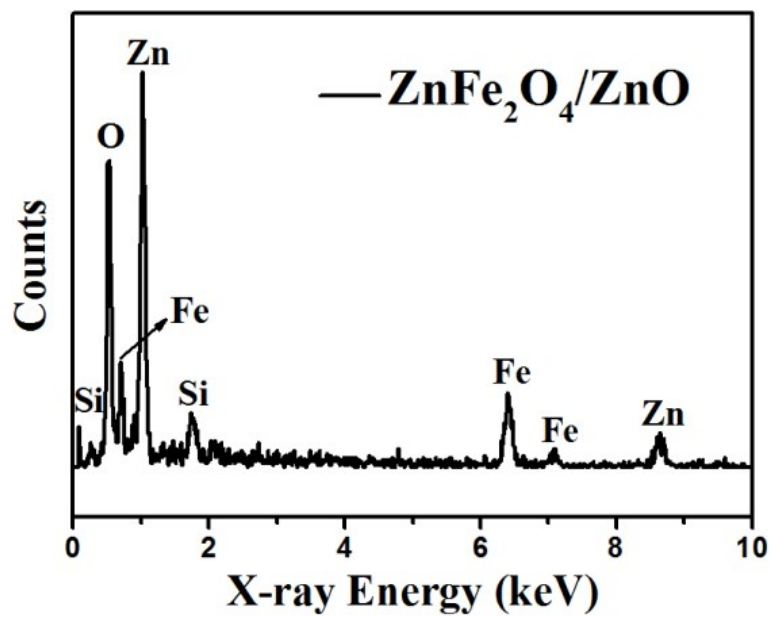

**Figure S7.** EDS spot scanning pattern of hybrid  $\text{ZnFe}_2\text{O}_4/\text{ZnO}$  hollow spheres.

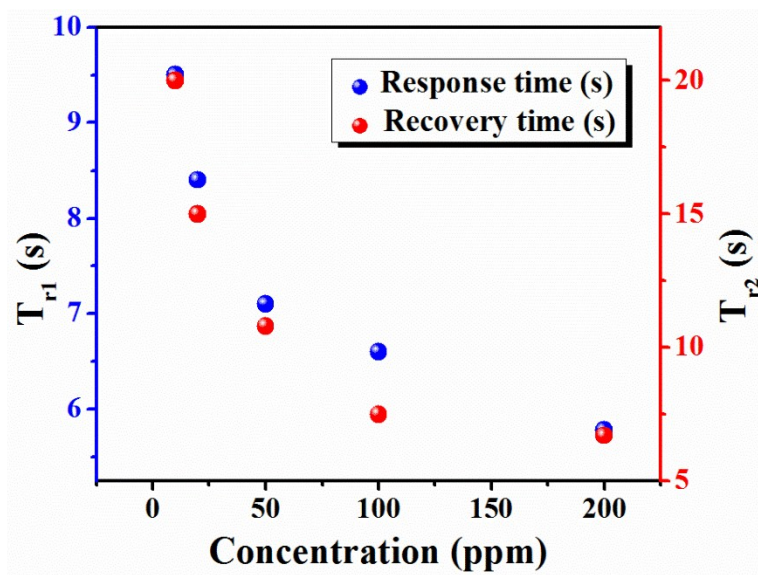

**Figure S8.** Response time and recovery time of hybrid  $\text{ZnFe}_2\text{O}_4/\text{ZnO}$  hollow spheres-based sensor to 10-200 ppm acetone.

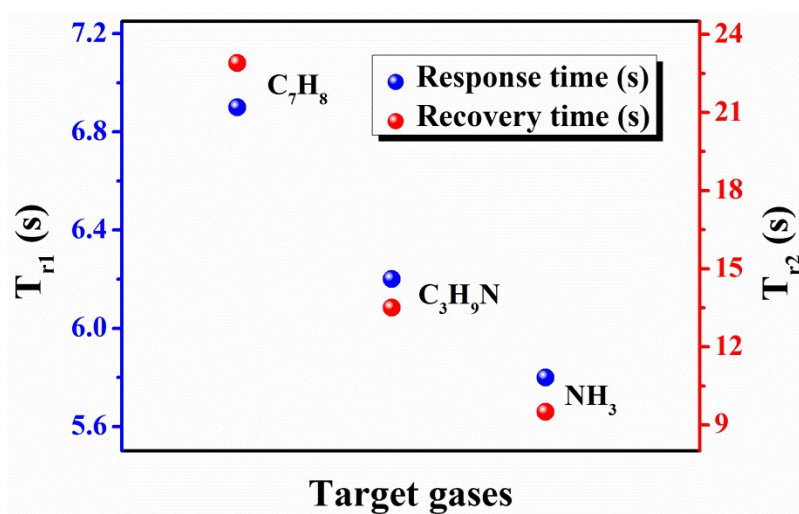

**Figure S9.** Response and recovery time towards 50 ppm C<sub>7</sub>H<sub>8</sub>, C<sub>3</sub>H<sub>9</sub>N and NH<sub>3</sub> at 280 °C of the sensor based on hybrid ZnFe<sub>2</sub>O<sub>4</sub>/ZnO hollow spheres.

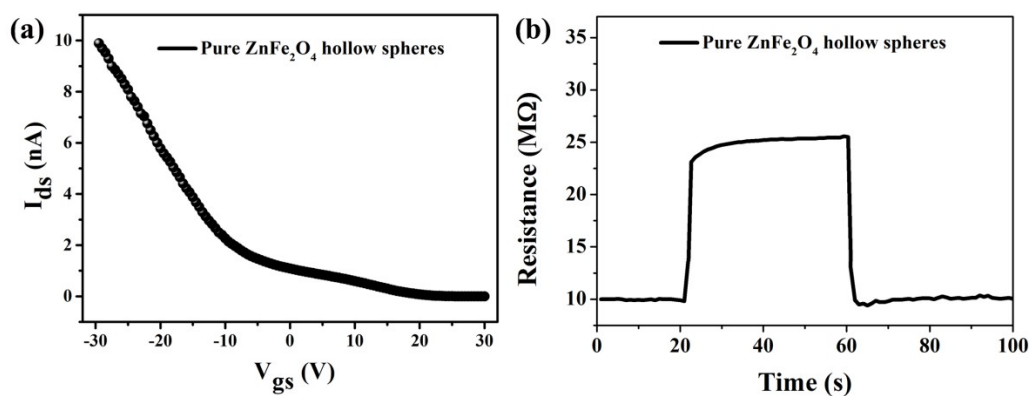

**Figure S10.** (a) Gating effect of the ZnFe<sub>2</sub>O<sub>4</sub>-based device and (b) resistance transient of the sensor based on pure ZnFe<sub>2</sub>O<sub>4</sub> hollow spheres-based sensor to 50 ppm acetone at the optimum temperature.

**Table S1** Detailed Experimental Parameters for the Preparation of Five ZnO- or ZnFe<sub>2</sub>O<sub>4</sub>- Samples.

| Sample No. | Starting reagents                                                                                             | Molar ratio of Zn to Fe | Final product                         |
|------------|---------------------------------------------------------------------------------------------------------------|-------------------------|---------------------------------------|
| S-1        | Zn(NO <sub>3</sub> ) <sub>3</sub> •6H <sub>2</sub> O and Fe(NO <sub>3</sub> ) <sub>3</sub> •9H <sub>2</sub> O | 10:1                    | ZnFe <sub>2</sub> O <sub>4</sub>      |
| S-2        | Zn(NO <sub>3</sub> ) <sub>3</sub> •6H <sub>2</sub> O and Fe(NO <sub>3</sub> ) <sub>3</sub> •9H <sub>2</sub> O | 12:1                    | ZnFe <sub>2</sub> O <sub>4</sub> /ZnO |
| S-3        | Zn(NO <sub>3</sub> ) <sub>3</sub> •6H <sub>2</sub> O and Fe(NO <sub>3</sub> ) <sub>3</sub> •9H <sub>2</sub> O | 15:1                    | ZnFe <sub>2</sub> O <sub>4</sub> /ZnO |
| S-4        | Zn(NO <sub>3</sub> ) <sub>3</sub> •6H <sub>2</sub> O and Fe(NO <sub>3</sub> ) <sub>3</sub> •9H <sub>2</sub> O | 20:1                    | ZnFe <sub>2</sub> O <sub>4</sub> /ZnO |
| S-5        | Zn(NO <sub>3</sub> ) <sub>3</sub> •6H <sub>2</sub> O and Fe(NO <sub>3</sub> ) <sub>3</sub> •9H <sub>2</sub> O | 1:0                     | ZnO                                   |
